# Supplementary material for: Autophagy-related protein 1 orchestrates autophagy initiation and feedback degradation in Alternaria alternata
Source: Research Square preprint supplement (doi:10.21203/rs.3.rs-8345089/v1), 2026-02-11
Supplement: Supplementary file 1 [file 67162abb48a21e41b8fd57c3.docx]

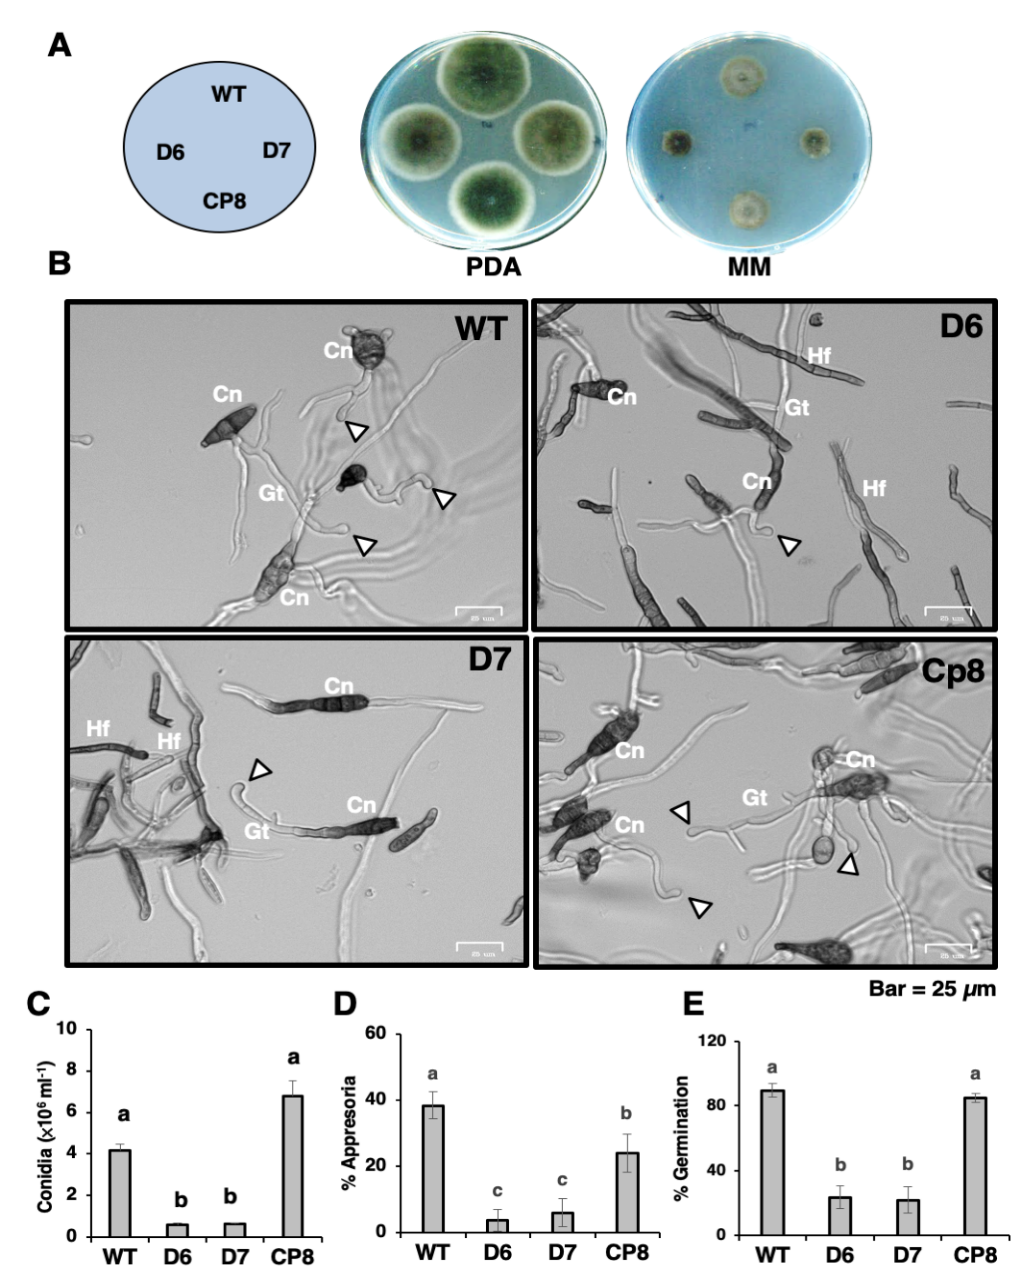
Supplementary Material

**Supplementary Figure S1.** AaAtg1 is required for conidial formation, germination, and appressorial formation. **(A)** Growth of wild type (WT), ∆*AaAtg1* mutants (D6 and D7), and the complementation strain (CP8) on PDA and MM for 4 days. **(B)** Representative images showing the conidial morphology of the WT, the ∆*AaAtg1* mutants (D6 and D7), and the CP8 strain. Arrowheads indicate the appressorium-like structures. Abbreviations: Cn, conidium; Gt, germination tube; Hf, hyphal fragments. **(C)** Quantitative analysis of conidiation. **(D)** Quantitative analysis of appressorial formation. **(E)** Quantitative analysis of conidial germination. Data represent the mean ± standard deviation (SD). Statistical significance was determined using Tukey’s HSD post-hoc test (**p*<0.05). Different letters indicate significant differences.


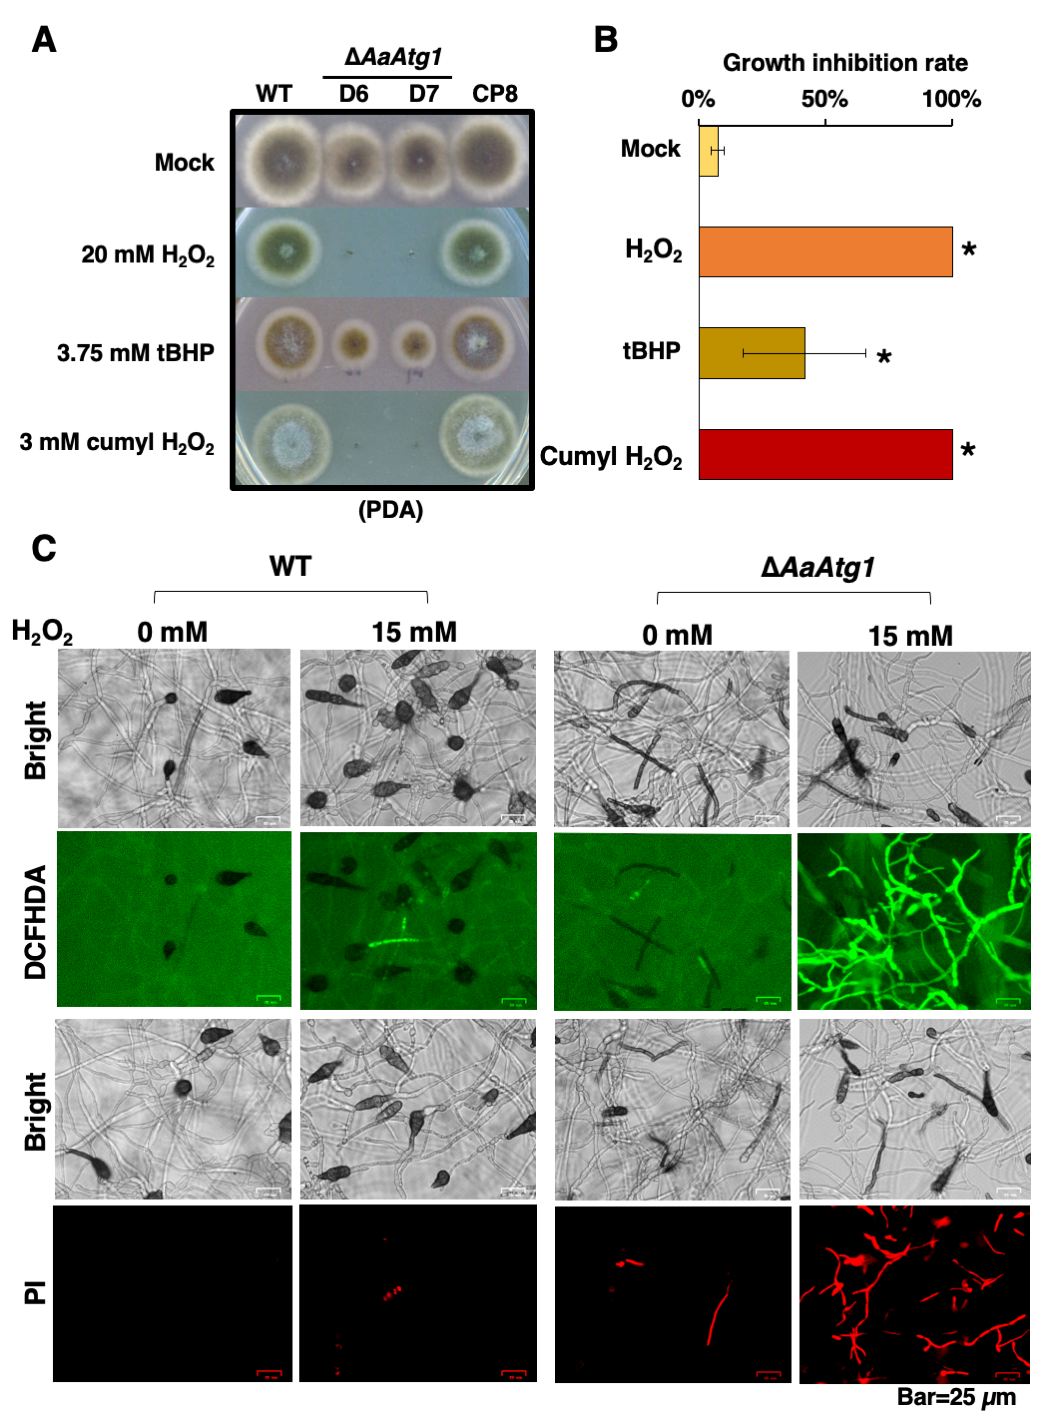


**Supplementary Figure S2.** AaAtg1 is required for ROS detoxification and cell survivability. **(A)** Sensitivity tests were conducted on PDA (mock) or PDA amended with a test chemical. **(B)** Percentage growth inhibition of *∆AaAtg1* compared to the wild type (WT) under oxidative stress conditions. Statistical significance was determined using Tukey’s HSD post-hoc test (**p*<0.05). Abbreviations: H₂O₂, hydrogen peroxide; tBHP, *tert*-butyl hydroperoxide. **(C)** Microscopic observation of Cell viability and ROS accumulation of WT and *∆AaAtg1*. Fungal strains were grown in PDB with or without 15 mM H₂O₂ for 8 h and stained with DCFHDA to detect ROS (green fluorescence) and PI to assess cell viability (red fluorescence).

**
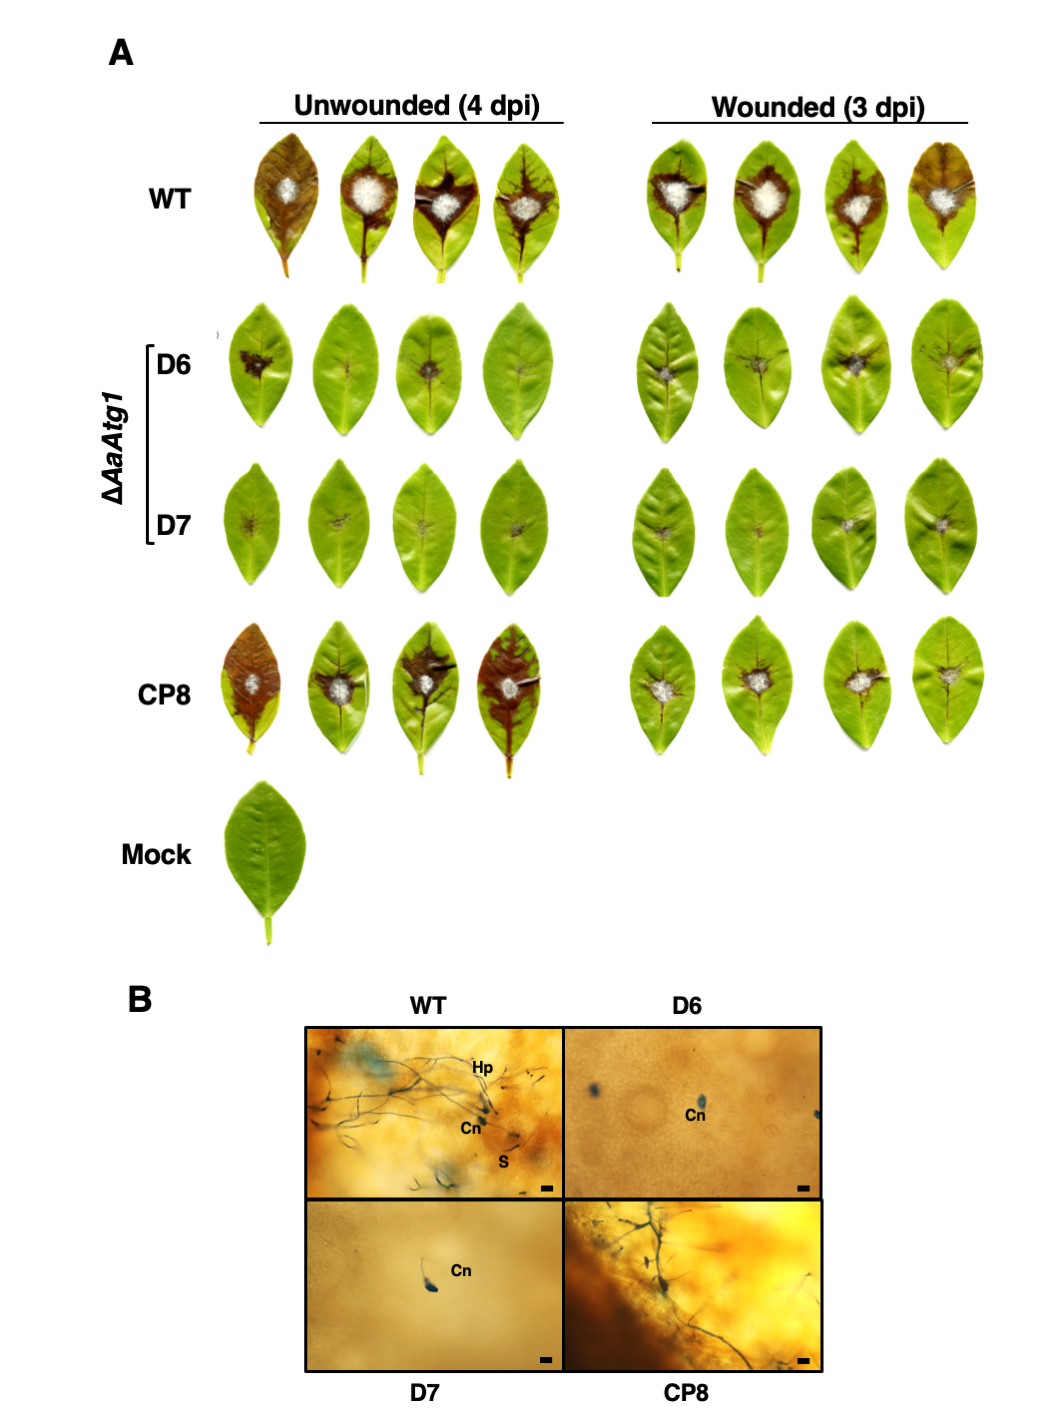
**

**Supplementary Figure S3.** AaAtg1 is necessary for fungal virulence. **(A)** Fungal virulence was evaluated on detached calamondin leaves. Leaves were inoculated with 10 µl of conidial suspensions (1 × 10⁵ cells/ml) of the wild-type (WT), ∆AaAtg1 (D6 and D7), or complementation (CP8) strains. Leaves were either left unwounded or wounded before inoculation and incubated in a moist chamber. Pictures were taken 3-4 days post-inoculation (dpi). **(B)** Microscopic images showing hyphal growth on the surface of inoculated leaves. Leaves were stained with lactophenol cotton blue at 1 dpi to visualize fungal growth. Scale bar = 20 μm.


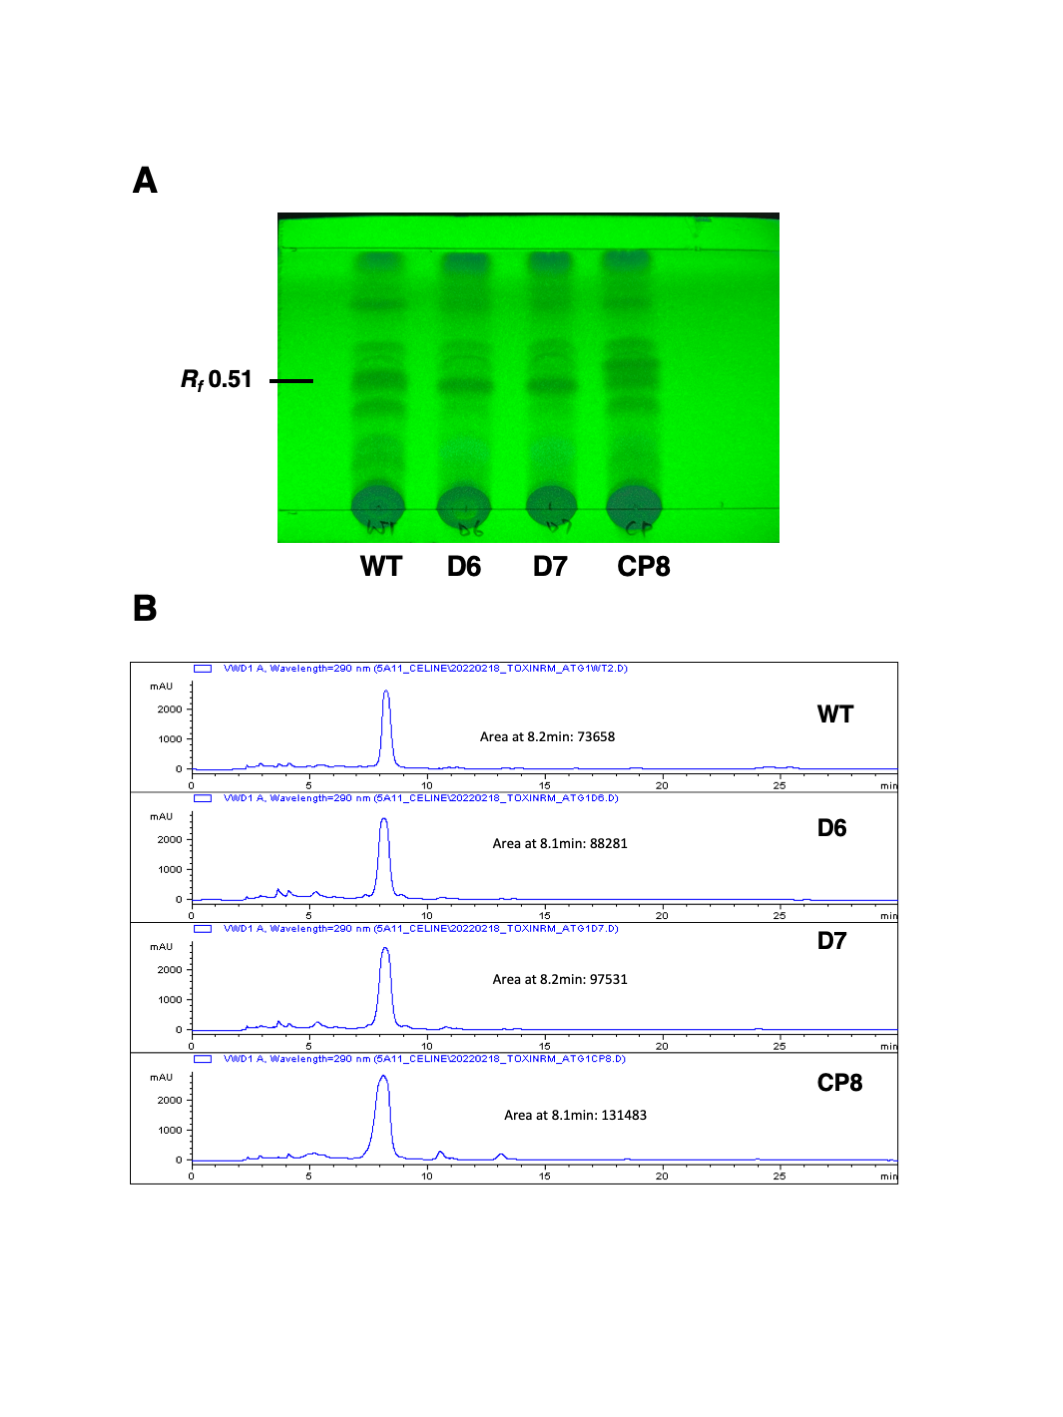


**Supplementary Figure S4.** AaAtg1 is not required for ACT toxin biosynthesis. **(A)** Thin-layer chromatography (TLC) analysis of ACT toxin extracted from the wild-type strain (WT), two ΔAaAtg1 mutants (D6 and D7), and the complementation strain (CP8). A fluorescent band with an Rf value of 0.51 was detected in all strains, indicating comparable ACT production. **(B)** High-performance liquid chromatography (HPLC) analysis of ACT toxin extracts. Each strain showed a major peak at approximately 8.1–8.2 min, with similar retention times and comparable peak areas: WT (73,658), D6 (88,281), D7 (97,531), and CP8 (131,483). These results indicate that AaAtg1 deletion does not impair ACT toxin biosynthesis.


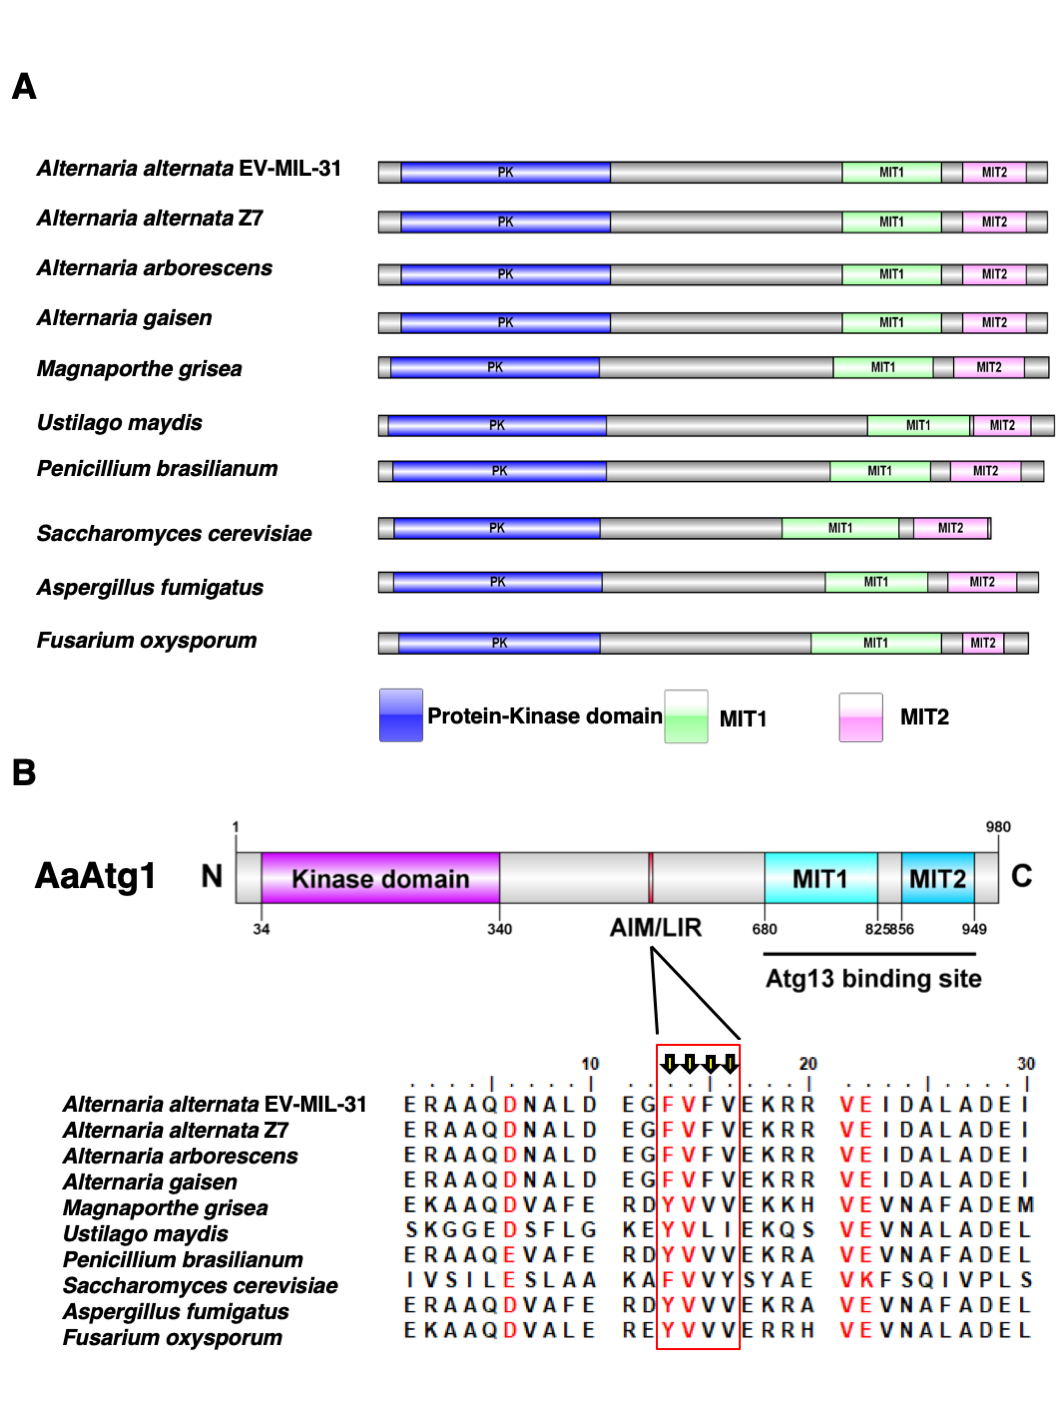


**Supplementary Figure S5.** Sequence alignment and functional domains of Atg1. **(A)** Multiple protein sequence alignment of Atg1 homologs across various fungi, including *A. alternata* (EV-MIL-31 strain), *A. alternata* (Z7 strain, OWY47754.1), *A. arborescens* (RYN40765.1), *A. gaisen* (KAB2100989.1), *Magnaporthe grisea* (ABB46201.1), *Ustilago maydis* (XP_011392657.1), *Penicillium brasilianum* (OOQ89124.1), *Saccharomyces cerevisiae* (KAG2516027.1), *Aspergillus fumigatus* (KAH1574071.1), and *Fusarium oxysporum* (KAK2689896.1). **(B)** Schematic showing the domains of AaAtg1. AaAtg1 contains an N-terminal kinase domain (N), an AIM/LIR region, and two MIT domains, which mediate binding to Atg13. Conserved residues within the AIM/LIR motifs are highlighted in a red box and marked by yellow arrowheads.
