# Supplementary material for: Autophagy-related protein 1 orchestrates autophagy initiation and feedback degradation in Alternaria alternata
Source: Research Square preprint supplement (doi:10.21203/rs.3.rs-8345089/v1), 2026-02-11
Supplement: Supplementary file 2 [file 9efa713259e77e522009153f.docx]

**Supplementary Table S1. Primers used in this study**

| Primer | Sequence (5’→3’)a | Usage |
| --- | --- | --- |
| ATG8 F EcoRV | TCTGATATCATGCGTTCCAAGTTTAAGGACGAG | Construction of pHygroGPE1-GFPN-AaAtg8 (for BiFC) |
| ATG8 R KpnI | actGGTACCCTAGATGGCCTCGCCGAATG |
| ATG1 F EcoRV | tctGATATCATGGCCTCACCCCCAAACC | Construction of pNeoGPEI-HA-AaAtg1 (for Co-IP), pNeoGPE1-GFPC-AaAtg1 (for BiFC) |
| ATG1 R KpnI | acaGGTACCCTACTTTGCGACACCCTGAGAAGG |
| Atg13_BiFC_BamHI_F | gatcGGATCCATGCACCCATACTCGCGC | Construction of pHygroGPE1-GFPN-AaAtg13 (for BiFC) |
| Atg13_BiFC_KpnI_R | gatcGGTACCTCAGCGGAAGTACGATCCACG |
| Pf_HA insertion | ATGGGCAGCTACCCATACGATGTTCCAGATTACGCTATCCAAGAACCTTTAATC | Construction of pNeoGPE1-HA-AaAtg1 (Co-PI) |
| Pr_HA insertion | AGCGTAATCTGGAACATCGTATGGGTAGCTGCCCATGGGAAGATGAATATACTG |
| ATG1 F EcoRV | tctGATATCATGGCCTCACCCCCAAACC | AaAtg1(2nd round PCR) |
| ATG1 R KpnI | acaGGTACCCTACTTTGCGACACCCTGAGAAGG |
| Atg1_delFVFV_F | CGCTTGACGAGGGCGAGAAGCGCCGTGTG | Amplification of AaAtg1ΔFVFV (deletion) 1st round PCR |
| Atg1_delFVFV_R | CACACGGCGCTTCTCGCCCTCGTCAAGCG |
| Atg1_AIMp.mut_F | GCGCTTGACGAGGCCGCTGTATTTGCCGCGAAGCGCCGTGTG | Amplification of AaAtg1AAVFAA (point mutation) 1st round PCR |
| Atg1_AIMp.mut_R | CACACGGCGCTTCGCGGCAAATACAGCGGCCTCGTCAAGCGC |
| ATG8_Bait_EcoRI-F | CATGGAGGCCGAATTCATGCGTTCCAAGTTTAAGGACGAG | AaAtg8 Bait |
| ATG8_Bait_BamHI-R | GCAGGTCGACGGATCCCTAGATGGCCTCGCCGAATGT |
| ATG1_prey_EcoRI-F | GATCGAATTCATGGCCTCACCCCCAAAC | AaAtg1, AaAtg1ΔFVFV, AaAtg1AAVFAA Prey |
| ATG1_prey_SacI-R | GATCGAGCTCTCATTCTGTGACACGATGAAACGC |
| Atg13_Bait_EcoRI_F | gatcGAATTCATGCACCCATACTCGCGC | AaAtg13 Bait |
| Atg13_Bait_BamHI_R | gatcGGATCCTCAGCGGAAGTACGATCCACG |

aRestriction enzyme recognition sites are underlined.

**Supplementary Table S2. Plasmids used in this study**

| Plasmid name | Vector | Recipient strain | Usage |
| --- | --- | --- | --- |
| AaAtg1 | pCB1532 | ∆*AaAtg1* | Complementation |
| GFP-AaAtg8 | pCB1532 | WT, ∆*AaAtg1* | Localization of AaAtg8 |
| mCherry-SKL | pCB1532 | WT, ∆*AaAtg1* | Localization of peroxisomes |
| GFP-AaAtg1 | pNeoGPE1 | ∆*AaAtg1*, ∆*AaAtg8* | Localization of AaAtg1 |
| GFP-AaAtg8 | pBARKS1 | ∆*AaAtg1* | AaAtg8-AaAtg1 AIM interaction studies |
| AaAtg1 | pCB1532 |
| AaAtg1ΔFVFV | pCB1532 |
| AaAtg1AAVFAA | pCB1532 |
| HA-AaAtg1 | pNeoGPE1 | WT | Co-IP |
| GFP-AaAtg8 | pCB1532 | WT | Co-IP |
| HA-AaAtg1 | pNeoGPE1 | WT | Co-IP |
| GFP-AaAtg8 | pCB1532 |
| BD-p53 Bait | pBGKT7 | Yeast strain | Y2H positive control |
| AD-Lam Prey | pGADT7 |
| BD-p53 Bait | pBGKT7 | Yeast strain | Y2H negative control |
| AD-T Prey | pGADT7 |
| AaAtg8 Bait | pBGKT7 | Yeast strain | AaAtg8-Atg1,  AaAtg8-AaAtg1ΔFVFV,  AaAtg8-AaAtg1AAVFAA (Y2H) |
| AaAtg1 Prey,  AaAtg1ΔFVFV Prey, AaAtg1AAVFAA Prey | pGADT7 |
| AaAtg13 Bait | pBGKT7 | Yeast strain | AaAtg13-AaAtg1 (Y2H) |
| AaAtg1 Prey | pGADT7 |
| GFP-AaAtg8 | pCB1532 | WT | Positive control for (BiFC) |
| GFPN | pHygroGPE1 | WT | Negative control for (BiFC) |
| GFPC | pNeoGPE1 |
| GFPN-AaAtg8 | pHygroGPE1 | WT | AaAtg8-AaAtg1 (BiFC) |
| GFPC-AaAtg1 | pNeoGPE1 | WT | AaAtg8-AaAtg1 (BiFC) |
| GFPC-AaAtg1ΔFVFV | pNeoGPE1 | WT | AaAtg8-AaAtg1ΔFVFV (BiFC) |
| GFPC-AaAtg1AAVFAA | pNeoGPE1 | WT | AaAtg8-AaAtg1AAVFAA (BiFC) |
| GFPN-AaAtg13 | pHygroGPE1 | WT | AaAtg13-AaAtg1 (BiFC) |
